# Supplementary material for: Metal-controlled structural variations of coordination architectures constructed from flexible 1H-benzimidazole-1-propionic acid
Source: Royal Society of Chemistry journal article supplement (doi:10.1039/c5ce01250c), 2015-01-01
Supplement: c5ce01250c1.pdf [file c5ce01250c1.pdf]

## Supporting Information

# Metal-controlled structural variations of coordination architectures constructed from the flexible 1*H*- benzimidazole-1-propionic acid

Zhong Zhang\*, Yan-Fang Feng, Qiu-Yu Wei, Kun Hu, Zi-Lu Chen and Fu-Pei Liang\*

### Corresponding authors

*Zhong Zhang and Fu-pei Liang*

### Affiliation and address

*Key Laboratory for the Chemistry and Molecular Engineering of Medicinal Resources (Ministry of Education of China), School of Chemistry and Pharmacy of Guangxi Normal University, Guilin 541004, P. R. China*

### E-mail address, telephone and fax numbers of the corresponding authors

*e-mail: zhangzhong@mailbox.gxnu.edu.cn*

*telephone: +86-773-5854878*

*fax: +86-773-5832294*

Fig.S1 Simulated and experimental powder X-ray diffraction (PXRD) patterns of complexes **1–6**:  
(a) for **1**, (b) for **2**, (c) for **3**, (d) for **4**, (e) for **5** and (f) for **6**.

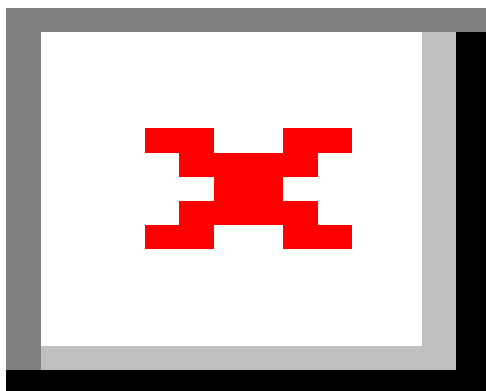

(a)

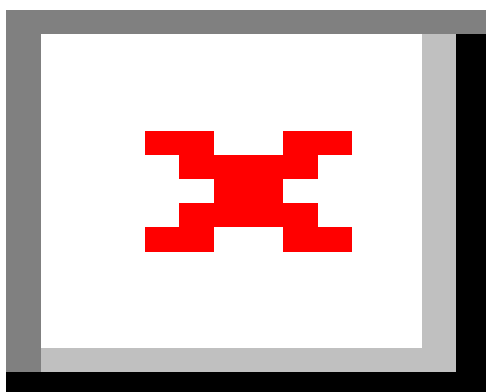

(b)

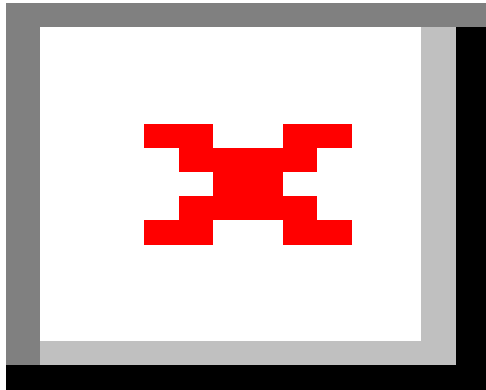

(c)

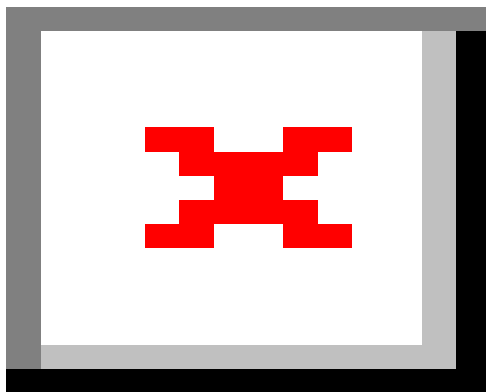

(d)

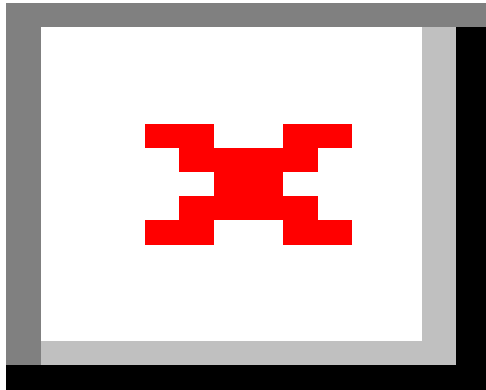

(e)



(f)

Fig.S2 TGA curves for complexes 1–5.

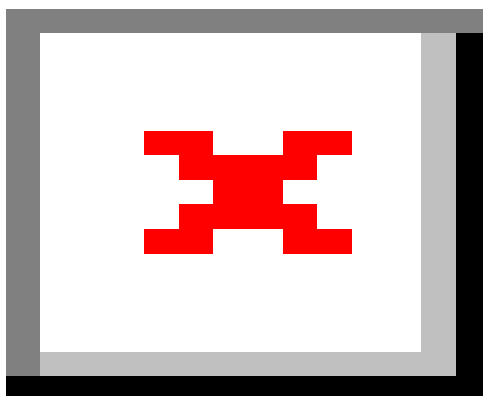

Fig.S3 The normalized solid-state photoluminescent excitation spectra of ligand Hbiap and complexes **3–6** at room temperature.

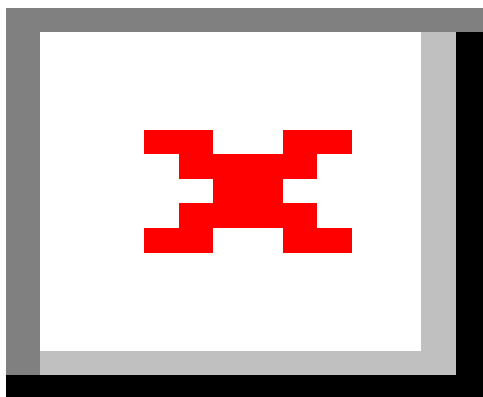

Table S1 Selected bond lengths (Å) and angles (°) for complexes **1–6**.

---

| Complex 1   |            |              |            |
|-------------|------------|--------------|------------|
| Co1–N2      | 2.034(3)   | Co1–N4       | 2.039(3)   |
| Co1–O5      | 1.974(2)   | Co1–O7#1     | 1.991(2)   |
| Co2–N6      | 2.045(3)   | Co2–N8       | 2.045(3)   |
| Co2–O1      | 1.954(3)   | Co2–O3#2     | 1.932(2)   |
| N2–Co1–N4   | 103.01(11) | N2–Co1–O5    | 116.65(11) |
| N2–Co1–O7#1 | 103.96(10) | N4–Co1–O5    | 110.71(11) |
| N4–Co1–O7#1 | 117.58(10) | O5–Co1–O7#1  | 105.26(11) |
| N6–Co2–N8   | 114.13(12) | N6–Co2–O1    | 111.97(11) |
| N6–Co2–O3#2 | 109.11(11) | N8–Co2–O1    | 102.29(11) |
| N8–Co2–O3#2 | 111.95(11) | O1–Co2–O3#2  | 107.06(11) |
| Complex 2   |            |              |            |
| Cu1–N2      | 2.001(2)   | Cu1–N4#1     | 2.011(2)   |
| Cu1–O3      | 1.985(2)   | Cu1–O5       | 1.975(2)   |
| Cu1–O9      | 2.409(2)   | Cu2–N6       | 1.998(2)   |
| Cu2–N8      | 1.996(2)   | Cu2–O1       | 1.947(2)   |
| Cu2–O8#2    | 1.952(2)   |              |            |
| N2–Cu1–N4#1 | 170.15(8)  | N2–Cu1–O3    | 89.24(8)   |
| N2–Cu1–O5   | 90.04(8)   | N2–Cu1–O9    | 95.73(8)   |
| O3–Cu1–N4#1 | 87.61(7)   | O5–Cu1–N4#1  | 92.43(7)   |
| O9–Cu1–N4#1 | 93.89(7)   | O3–Cu1–O5    | 175.88(7)  |
| O3–Cu1–O9   | 96.28(7)   | O5–Cu1–O9    | 87.83(7)   |
| N6–Cu2–N8   | 179.28(9)  | N6–Cu2–O1    | 89.74(8)   |
| N6–Cu2–O8#2 | 89.75(8)   | N8–Cu2–O1    | 90.60(8)   |
| N8–Cu2–O8#2 | 89.92(8)   | O1–Cu2–O8#2  | 179.30(8)  |
| Complex 3   |            |              |            |
| Ag1–N2      | 2.359(8)   | Ag1–N2#1     | 1.969(6)   |
| O2–H2C      | 1.23       | N2–Ag1–N2#1  | 154.47(12) |
| Complex 4   |            |              |            |
| Zn1–N2      | 2.035(2)   | Zn1–N4       | 2.033(2)   |
| Zn1–O1#1    | 1.954(2)   | Zn1–O3#2     | 1.955(2)   |
| N2–Zn1–N4   | 107.89(7)  | N2–Zn1–O1#1  | 112.76(7)  |
| N2–Zn1–O3#2 | 109.92(7)  | N4–Zn1–O1#1  | 117.97(7)  |
| N4–Zn1–O3#2 | 100.76(7)  | O1A–Zn1–O3#2 | 106.72(7)  |
| Complex 5   |            |              |            |
| Cd1–N2      | 2.257(3)   | Cd1–N4       | 2.292(3)   |
| Cd1–O5      | 2.415(2)   | Cd1–O6       | 2.322(2)   |
| Cd1–O7      | 2.452(2)   | Cd1–O8       | 2.315(2)   |

|             |            |             |            |
|-------------|------------|-------------|------------|
| Cd2–N6      | 2.258(3)   | Cd2–N8      | 2.243(3)   |
| Cd2–O1      | 2.515(2)   | Cd2–O2#1    | 2.294(3)   |
| Cd2–O3      | 2.368(3)   | Cd2–O4      | 2.383(2)   |
| N2–Cd1–N4   | 97.04(10)  | N2–Cd1–O5   | 98.51(10)  |
| N2–Cd1–O6   | 109.67(9)  | N2–Cd1–O7   | 85.98(9)   |
| N2–Cd1–O8   | 137.19(9)  | N4–Cd1–O5   | 141.06(9)  |
| N4–Cd1–O6   | 86.36(9)   | N4–Cd1–O7   | 99.15(9)   |
| N4–Cd1–O8   | 104.97(9)  | O5–Cd1–O6   | 54.78(8)   |
| O5–Cd1–O7   | 117.35(8)  | O5–Cd1–O8   | 86.96(8)   |
| O6–Cd1–O7   | 162.77(9)  | O6–Cd1–O8   | 107.98(9)  |
| O7–Cd1–O8   | 54.86(8)   | N6–Cd2–N8   | 111.49(11) |
| N6–Cd2–O1   | 107.89(9)  | N6–Cd2–O2#1 | 91.82(10)  |
| N6–Cd2–O3   | 137.87(10) | N6–Cd2–O4   | 84.28(10)  |
| N8–Cd2–O1   | 82.86(10)  | N8–Cd2–O2#1 | 134.67(10) |
| N8–Cd2–O3   | 90.10(10)  | N8–Cd2–O4   | 107.90(10) |
| O1–Cd2–O2#1 | 52.51(9)   | O1–Cd2–O3   | 110.46(9)  |
| O1–Cd2–O4   | 160.00(9)  | O3–Cd2–O2#1 | 97.84(9)   |
| O3–Cd2–O4   | 54.17(9)   | O4–Cd2–O2#1 | 112.84(9)  |

#### Complex 6

|               |           |               |            |
|---------------|-----------|---------------|------------|
| Hg1–Cl1       | 2.611(2)  | Hg1–N2        | 2.163(3)   |
| Hg2–Cl1       | 2.985(2)  | Hg2–Cl2       | 2.340(2)   |
| Cl1–Hg1–Cl1#1 | 100.17(7) | Cl1–Hg1–N2    | 102.95(10) |
| Cl1–Hg1–N2#1  | 98.87(10) | N2–Hg1–N2#1   | 145.72(12) |
| Cl1–Hg2–Cl2   | 90.64(4)  | Cl1–Hg2–Cl2#2 | 89.37(4)   |
| Cl1–Hg2–Cl1#2 | 180.00    | Cl2–Hg2–Cl2#2 | 180.00     |

Symmetry transformations used to generate equivalent atoms for **1**: #1  $x, 1+y, z$ ; #2  $x, -1+y, z$ . for **2**: #1  $1-x, y, 1/2-z$ ; #2  $-x, y, 3/2-z$ . for **3**: #1  $1/2-x, 1/2-y, 1-z$ . for **4**: #1  $x, -1+y, z$ ; #2  $x, 1/2-y, 1/2+z$ . for **5**: #1  $4/3+x-y, 2/3+x, 5/3-z$ . for **6**: #1  $1-x, y, 1/2-z$ ; #2  $1-x, 3-y, -z$ .



Table S2 Hydrogen bond distances (Å) and angles (°) for complexes **2**, **3** and **6**.

| D–H···A                      | <i>d</i> (D–H) | <i>d</i> (H···A) | <i>d</i> (D···A) | ∠D–H···A |
|------------------------------|----------------|------------------|------------------|----------|
| <b>Complex 2</b>             |                |                  |                  |          |
| O9–H9D···O4                  | 0.85           | 2.03             | 2.727(3)         | 138      |
| O10–H10C···O9#1              | 0.85           | 2.51             | 2.943(3)         | 112      |
| O10–H10C···O10#1             | 0.85           | 2.53             | 3.249(4)         | 143      |
| O10–H10D···O5                | 0.85           | 2.08             | 2.924(3)         | 174      |
| O11–H11C···O6                | 0.85           | 1.90             | 2.745(3)         | 172      |
| O11–H11D···O13               | 0.85           | 2.03             | 2.863(3)         | 164      |
| O12–H12C···O2                | 0.85           | 2.15             | 2.812(3)         | 135      |
| O12–H12D···O11               | 0.85           | 2.01             | 2.780(4)         | 151      |
| O13–H13C···O14               | 0.85           | 1.87             | 2.714(3)         | 172      |
| O13–H13D···O3                | 0.85           | 2.04             | 2.857(3)         | 160      |
| O14–H14C···O8#2              | 0.85           | 2.08             | 2.785(3)         | 140      |
| O15–H15D···O7#3              | 0.85           | 2.18             | 2.816(4)         | 131      |
| O16–H16C···O1                | 0.85           | 1.92             | 2.758(3)         | 170      |
| O16–H16D···O16#3             | 0.85           | 2.20             | 2.731(4)         | 120      |
| <b>Complex 3</b>             |                |                  |                  |          |
| O3–H3C···O2#1                | 0.85           | 2.47             | 2.919(10)        | 114      |
| O3–H3D···O1#2                | 0.85           | 2.08             | 2.864(10)        | 154      |
| <b>Complex 6<sup>d</sup></b> |                |                  |                  |          |
| O2–H2C···O1#1                | 0.85           | 2.05             | 2.677(6)         | 130      |

Symmetry transformations used to generate equivalent atoms for **2**: #1 1–*x*, 1–*y*, 1–*z*; #2 –*x*, –*y*, 1–*z*; #3 –*x*, 1–*y*, 1–*z*. for **3**: #1 1/2–*x*, –1/2+*y*, 1/2–*z*; #2 1/2+*x*, 1/2–*y*, 1/2+*z*. for **6**: #1 –*x*, 1–*y*, –*z*.
